# Supplementary material
Source: PubMed Central journal article supplement (PMC11000690)
Supplement: NIHMS1979180-supplement-Sup_Table.pdf [file NIHMS1979180-supplement-Sup_Table.pdf]

**Supplemental Table 1. Inactive responses during cue-induced seeking tests**

| <b>Figure</b> | <b>Drug</b> | <b>Treatment</b> | <b>Mean <math>\pm</math> SEM</b> |
|---------------|-------------|------------------|----------------------------------|
| Fig. 3B       | Saline      | N/A              | 7.3 $\pm$ 2.7                    |
|               | cocaine     | N/A              | 12.71 $\pm$ 5.56                 |
| Fig. 4C       | cocaine     | Vehicle          | 15.88 $\pm$ 6.07                 |
|               | cocaine     | DO-34            | 12.11 $\pm$ 3.90                 |
| Fig. 4G       | cocaine     | Vehicle          | 19.77 $\pm$ 6.33                 |
|               | cocaine     | URB-602          | 14.88 $\pm$ 2.70                 |
